# Supplementary material
Source: publisher figshare collection journal article supplement (https://acs.figshare.com/ndownloader/files/31555437)
Supplement: Supplementary file 1 [file 31555437]

# **Operando NMR Spectroscopic Analysis of the Effects of Pt Nanoparticle Size and Crystal Facet Structure on the Alcohol Reforming Reactions**

Bei-Bei Xu, Xiao-Meng You, Jing-Xian Dong, Xue-Lu Wang\* and Ye-Feng Yao\*

Physics Department & Shanghai Key Laboratory of Magnetic Resonance, School of Physics and Materials Science, East China Normal University, North Zhongshan Road 3663, Shanghai 200062, P. R. China

\*Corresponding author

E-mail: [xlwang@phy.ecnu.edu.cn](mailto:xlwang@phy.ecnu.edu.cn); [yfyao@phy.ecnu.edu.cn](mailto:yfyao@phy.ecnu.edu.cn)



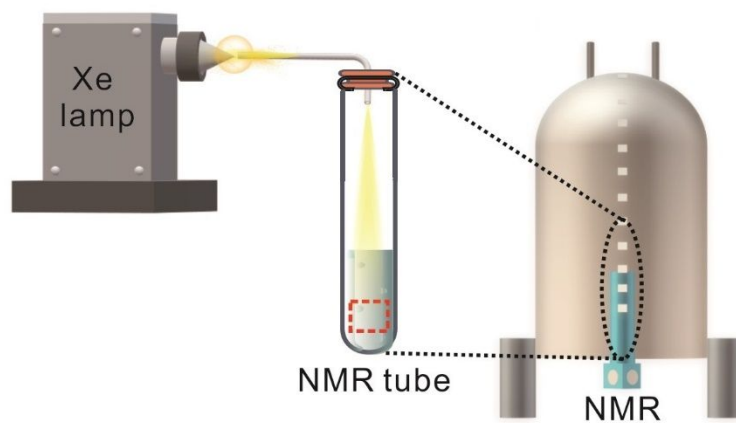

**Figure S1.** Schematic layout of set-up for operando NMR studies.

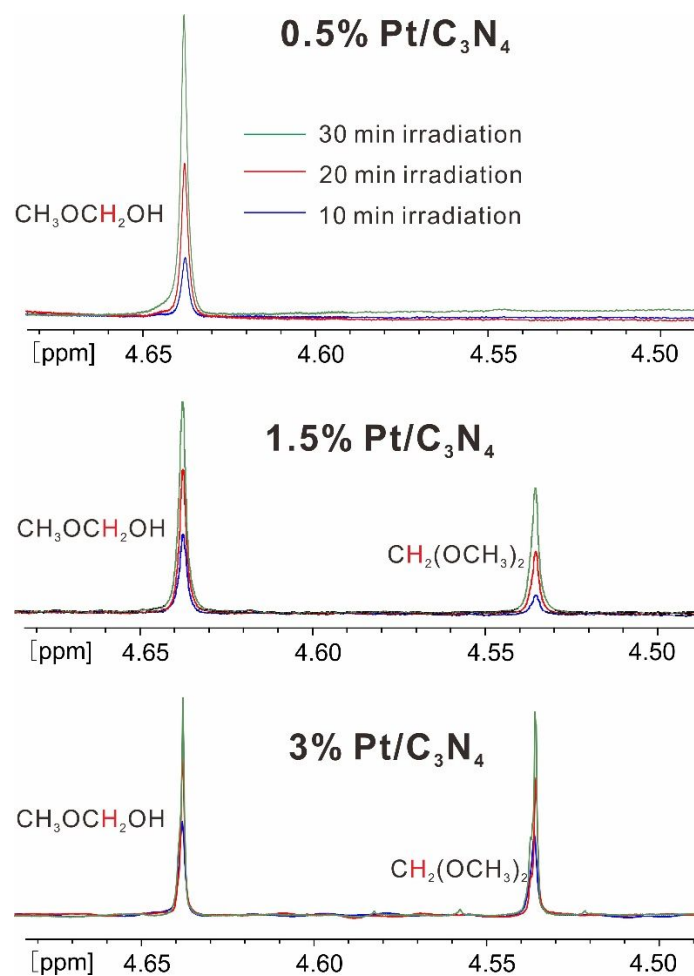

**Figure S2.**  $^1\text{H}$  NMR spectra of methanol reforming products obtained for the Pt/ $\text{C}_3\text{N}_4$  photocatalyst samples after 10 min, 20 min and 30 min of visible light irradiation (>400 nm, 300 W Xe lamp).

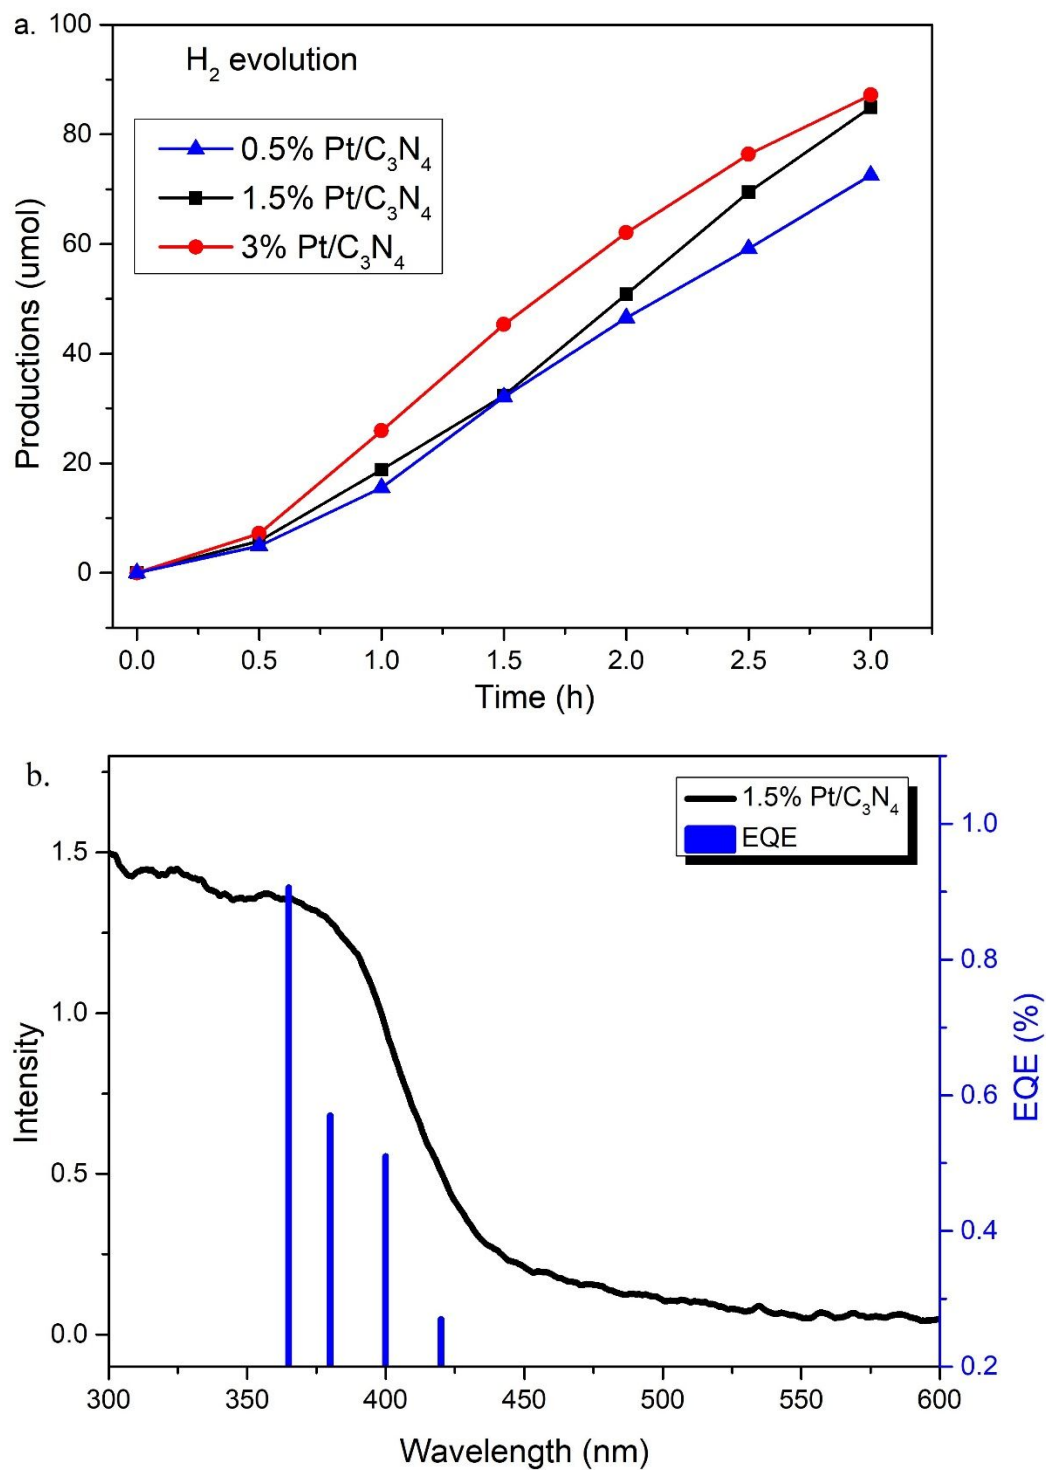

**Figure S3.** a. Photocatalytic  $\text{H}_2$  evolution over  $\text{Pt}/\text{C}_3\text{N}_4$  catalysts (20 mg) and  $\text{CH}_3\text{OH}$  (50 mL) under visible light irradiation observed by GC chromatography. b. The wavelength-dependent external quantum efficiency (EQE) of 1.5%  $\text{Pt}/\text{C}_3\text{N}_4$  at 365 nm, 380 nm, 400 nm and 420 nm.

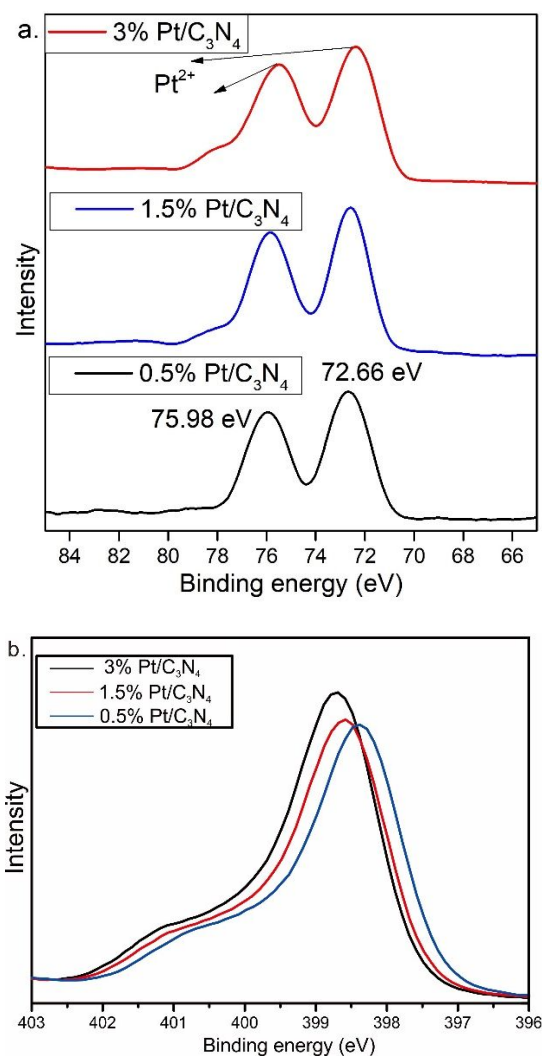

**Figure S4.** High resolution of XPS analysis of (a) Pt<sub>4f</sub> and (b) N<sub>1s</sub> of 0.5% Pt/C<sub>3</sub>N<sub>4</sub>, 1.5% Pt/C<sub>3</sub>N<sub>4</sub>, and 3% Pt/C<sub>3</sub>N<sub>4</sub> samples.



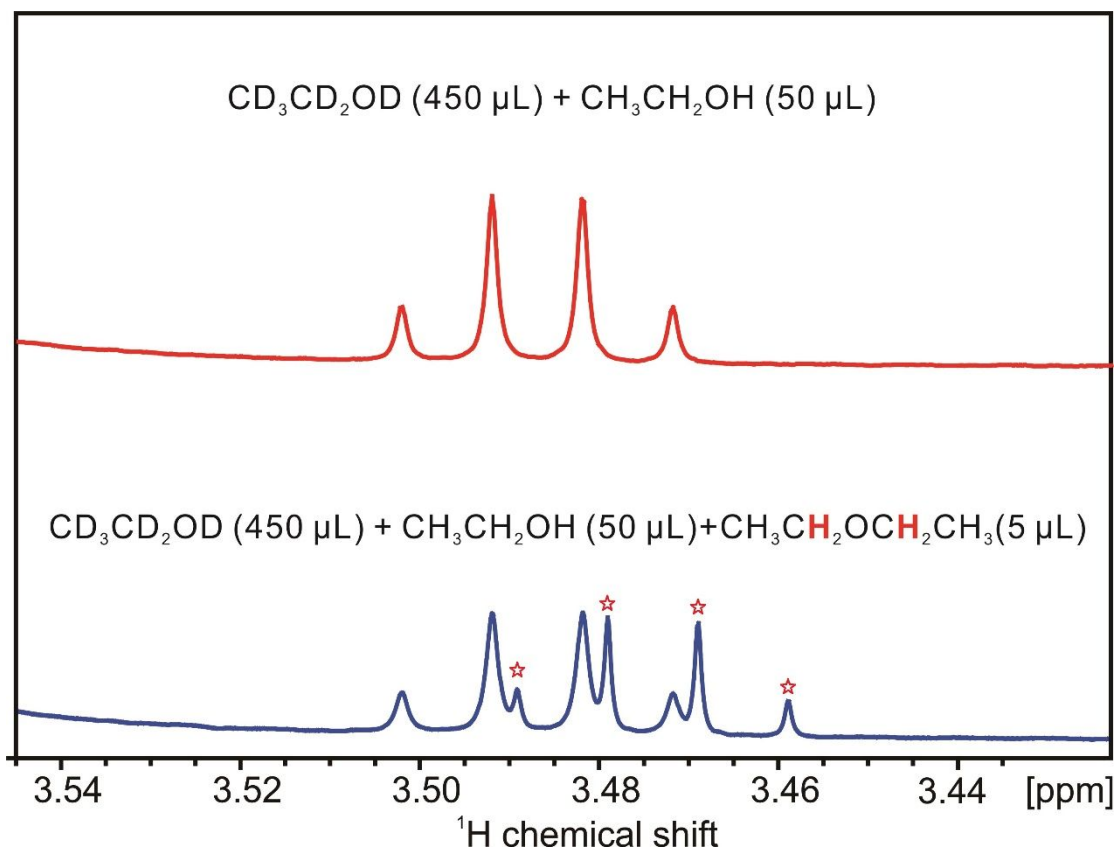

**Figure S5.** <sup>1</sup>H NMR spectra of CD<sub>3</sub>CD<sub>2</sub>OD (450 μL) + CH<sub>3</sub>CH<sub>2</sub>OH (50 μL) + CH<sub>3</sub>CH<sub>2</sub>OCH<sub>2</sub>CH<sub>3</sub> (5 μL) and CD<sub>3</sub>CD<sub>2</sub>OD (450 μL) + CH<sub>3</sub>CH<sub>2</sub>OH (50 μL). The quadruplet peak (1:2:2:1) in the red spectrum represents CH<sub>2</sub> of CH<sub>3</sub>CH<sub>2</sub>OH, and the new quadruplet peak (1:2:2:1) in the blue spectrum is the CH<sub>2</sub> signal of additional CH<sub>3</sub>CH<sub>2</sub>OCH<sub>2</sub>CH<sub>3</sub>.



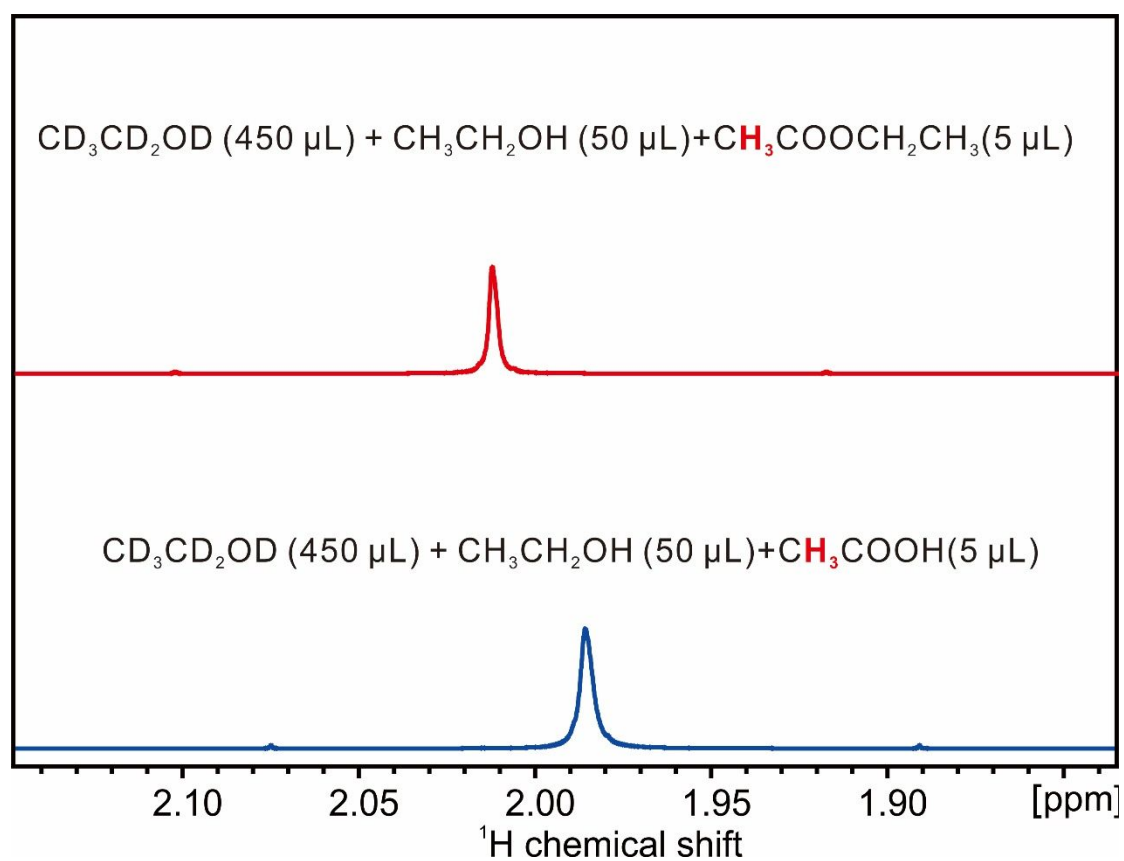

**Figure S6.** <sup>1</sup>H NMR spectra of CD<sub>3</sub>CD<sub>2</sub>OD (450 µL) + CH<sub>3</sub>CH<sub>2</sub>OH (50 µL) + CH<sub>3</sub>COOH (5 µL) and CD<sub>3</sub>CD<sub>2</sub>OD (450 µL) + CH<sub>3</sub>CH<sub>2</sub>OH (50 µL) + CH<sub>3</sub>COOCH<sub>2</sub>CH<sub>3</sub> (5 µL).

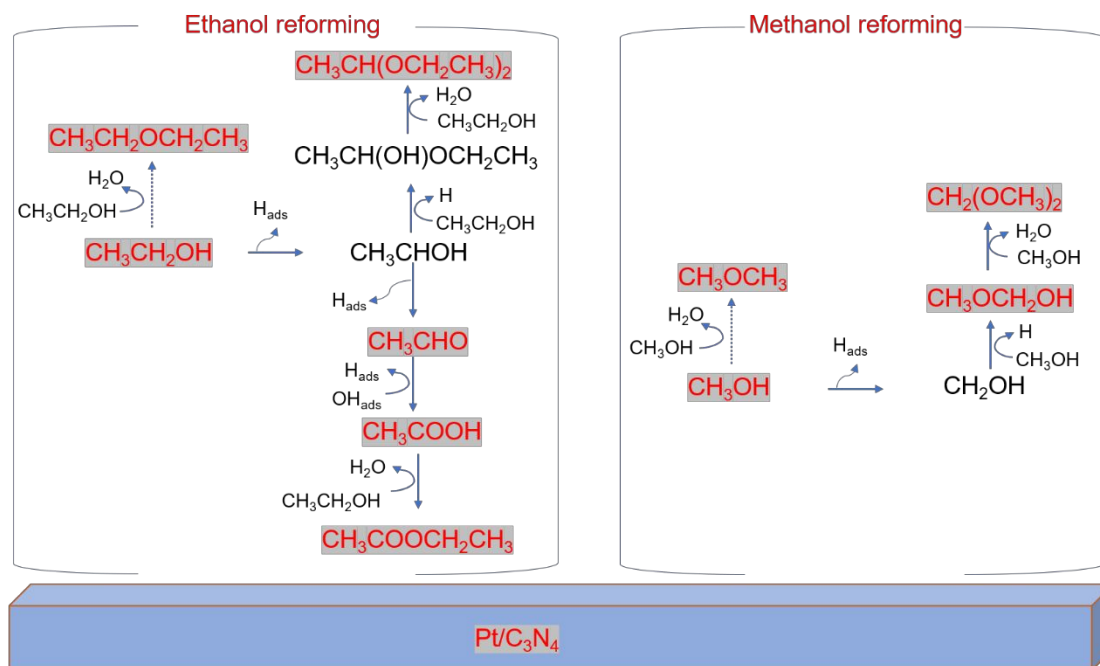

**Figure S7.** Methanol and ethanol reforming reaction pathways on  $\text{Pt/C}_3\text{N}_4$  catalysts, proposed on the basis of literature data and our previous reports<sup>1-2</sup>.

1. Kim, I.; Han, O. H.; Chae, S. A.; Paik, Y.; Kwon, S.-H.; Lee, K.-S.; Sung, Y.-E.; Kim, H., Catalytic Reactions in Direct Ethanol Fuel Cells. *Angew. Chem. Int. Ed.* **2011**, *50*, 2270-2274.
2. Xu, B.-B.; Zhou, M.; Zhang, R.; Ye, M.; Yang, L.-Y.; Huang, R.; Wang, H. F.; Wang, X. L.; Yao, Y.-F., Solvent Water Controls Photocatalytic Methanol Reforming. *J. Phys. Chem. Lett.* **2020**, *11*, 3738-3744.
